# Supplementary material
Source: HighWire-hosted journal article supplement (doi:10.1101/rna.080026.124)
Supplement: Supplemental_Table_S1_strains.xlsx [file Supplemental_Table_S1_strains.xlsx]

## Sheet: strain_genotype
Number	strain_original_name (Seq)	SeqId	strain (used in Paper)	Background	Genotype	Genotype Old	Source	Check
1	C-SWAT_original	C-SWAT_ORIGINAL	C-SWAT_original	S288c	BY4741 ORF::Orf-SWATmodule	BY4741 ORF::Orf-SWATmodule	Meurer et al., 2018
2	Puf3	PUF3	Puf3	BY4741	BY4741 PUF3::Puf3-Pup2	BY4741 PUF3::Puf3-Pup2	This study
3	Sro9	SRO9	Sro9	BY4741	BY4741 SRO9::Sro9-Pup2	BY4741 SRO9::Sro9-Pup2	This study
4	Puf5	PUF5	Puf5	BY4741	BY4741 PUF5::Puf5-Pup2	BY4741 PUF5::Puf5-Pup2	This study
5	Puf4	PUF4	Puf4	BY4741	BY4741 PUF4::Puf4-Pup2	BY4741 PUF4::Puf4-Pup2	This study
6	Puf2	PUF2	Puf2	BY4741	BY4741 PUF2::Puf2-Pup2	BY4741 PUF2::Puf2-Pup2	This study
7	Puf1	PUF1	Puf1	BY4741	BY4741 PUF1::Puf1-Pup2	BY4741 PUF1::Puf1-Pup2	This study
8	Puf6	PUF6	Puf6	BY4741	BY4741 PUF6::Puf6-Pup2	BY4741 PUF6::Puf6-Pup2	This study
9	Nab6	NAB6	Nab6	BY4741	BY4741 NAB6::Nab6-Pup2	BY4741 NAB6::Nab6-Pup2	This study
10	Rie1	RIE1	Rie1	BY4741	BY4741 RIE1::Rie1-Pup2	BY4741 RIE1::Rie1-Pup2	This study
11	Scp160	SCP160	Scp160	BY4741	BY4741 SCP160::Scp160-Pup2	BY4741 SCP160::Scp160-Pup2	This study
12	Nrd1	NRD1	Nrd1	BY4741	BY4741 NRD1::Nrd1-Pup2	BY4741 NRD1::Nrd1-Pup2	This study
13	Rmd9	RMD9	Rmd9	BY4741	BY4741 RMD9::Rmd9-Pup2	BY4741 RMD9::Rmd9-Pup2	This study
14	Pub1	PUB1	Pub1	BY4741	BY4741 PUB1::Pub1-Pup2	BY4741 PUB1::Pub1-Pup2	This study
15	Nsr1	NSR1	Nsr1	BY4741	BY4741 NSR1::Nsr1-Pup2	BY4741 NSR1::Nsr1-Pup2	This study
16	Npl3	NPL3	Npl3	BY4741	BY4741 NPL3::Npl3-Pup2	BY4741 NPL3::Npl3-Pup2	This study
17	Dhh1	DHH1	Dhh1	BY4741	BY4741 DHH1::Dhh1-Pup2	BY4741 DHH1::Dhh1-Pup2	This study
18	Mss116	MSS116	Mss116	BY4741	BY4741 MSS116::Mss116-Pup2	BY4741 MSS116::Mss116-Pup2	This study
19	Rat1	RAT1	Rat1	BY4741	BY4741 RAT1::Rat1-Pup2	BY4741 RAT1::Rat1-Pup2	This study
20	Ecm32	ECM32	Ecm32	BY4741	BY4741 ECM32::Ecm32-Pup2	BY4741 ECM32::Ecm32-Pup2	This study
21	Slf1	SLF1	Slf1	BY4741	BY4741 SLF1::Slf1-Pup2	BY4741 SLF1::Slf1-Pup2	This study
22	Dbp1	DBP1	Dbp1	BY4741	BY4741 DBP1::Dbp1-Pup2	BY4741 DBP1::Dbp1-Pup2	This study
23	Nam8	NAM8	Nam8	BY4741	BY4741 NAM8::Nam8-Pup2	BY4741 NAM8::Nam8-Pup2	This study
24	Pbp1	PBP1	Pbp1	BY4741	BY4741 PBP1::Pbp1-Pup2	BY4741 PBP1::Pbp1-Pup2	This study
25	Pin4	PIN4	Pin4	BY4741	BY4741 PIN4::Pin4-Pup2	BY4741 PIN4::Pin4-Pup2	This study
26	Psp2	PSP2	Psp2	BY4741	BY4741 PSP2::Psp2-Pup2	BY4741 PSP2::Psp2-Pup2	This study
27	Nam7	NAM7	Nam7	BY4741	BY4741 NAM7::Nam7-Pup2	BY4741 NAM7::Nam7-Pup2	This study
28	Mrn1	MRN1	Mrn1	BY4741	BY4741 MRN1::Mrn1-Pup2	BY4741 MRN1::Mrn1-Pup2	This study
29	Bfr1	BFR1	Bfr1	BY4741	BY4741 BFR1::Bfr1-Pup2	BY4741 BFR1::Bfr1-Pup2	This study
30	Tis11	TIS11	Tis11	BY4741	BY4741 TIS11::Tis11-Pup2	BY4741 TIS11::Tis11-Pup2	This study
31	Yll032c	YLL032C	Yll032c	BY4741	BY4741 YLL032C::Yll032c-Pup2	BY4741 YLL032C::Yll032c-Pup2	This study
32	Gbp2	GBP2	Gbp2	BY4741	BY4741 GBP2::Gbp2-Pup2	BY4741 GBP2::Gbp2-Pup2	This study
33	Ngr1	NGR1	Ngr1	BY4741	BY4741 NGR1::Ngr1-Pup2	BY4741 NGR1::Ngr1-Pup2	This study
34	Pbp2	PBP2	Pbp2	BY4741	BY4741 PBP2::Pbp2-Pup2	BY4741 PBP2::Pbp2-Pup2	This study
35	Yhc1	YHC1	Yhc1	BY4741	BY4741 YHC1::Yhc1-Pup2	BY4741 YHC1::Yhc1-Pup2	This study
36	Puf5_dead	PUF5_DEAD	Puf5_dead	BY4741	BY4741 PUF5::Puf5-deadPup2	BY4741 PUF5_DEAD::Puf5_dead-Pup2	This study
37	Puf4_dead	PUF4_DEAD	Puf4_dead	BY4741	BY4741 PUF4::Puf4-deadPup2	BY4741 PUF4_DEAD::Puf4_dead-Pup2	This study
38	Puf3_dead	PUF3_DEAD	Puf3_dead	BY4741	BY4741 PUF3::Puf3-deadPup2	BY4741 PUF3_DEAD::Puf3_dead-Pup2	This study
39	Puf3_C-SWAT_ctrl	PUF3_C-SWAT_CTRL	Puf3_C-SWAT_ctrl	BY4741	BY4741 PUF3::Puf3_C-SWAT	BY4741 PUF3_C-SWAT_CTRL::Puf3_C-SWAT_ctrl-Pup2	This study
40	Puf4_C-SWAT_ctrl	PUF4_C-SWAT_CTRL	Puf4_C-SWAT_ctrl	BY4741	BY4741 PUF4::Puf4_C-SWAT	BY4741 PUF4_C-SWAT_CTRL::Puf4_C-SWAT_ctrl-Pup2	This study
41	Puf5_C-SWAT_ctrl	PUF5_C-SWAT_CTRL	Puf5_C-SWAT_ctrl	BY4741	BY4741 PUF5::Puf5_C-SWAT	BY4741 PUF5_C-SWAT_CTRL::Puf5_C-SWAT_ctrl-Pup2	This study
42	Puf3_ΔRBD_del535	PUF3_ΔRBD_DEL535	Puf3_ΔRBD	BY4741	BY4741 PUF3::Puf3_ΔRBD-Pup2	BY4741 PUF3_ΔRBD::Puf3_ΔRBD-Pup2	This study
43	Puf3_ΔTrc1	PUF3_ΔTRC1	Puf3_T1	BY4741	BY4741 PUF3::Puf3_T1-Pup2	BY4741 PUF3_T1::Puf3_T1-Pup2	This study
44	Puf3_ΔTrc2	PUF3_ΔTRC2	Puf3_T2	BY4741	BY4741 PUF3::Puf3_T2-Pup2	BY4741 PUF3_T2::Puf3_T2-Pup2	This study
45	Puf3_ΔTrc3	PUF3_ΔTRC3	Puf3_T3	BY4741	BY4741 PUF3::Puf3_T3-Pup2	BY4741 PUF3_T3::Puf3_T3-Pup2	This study
46	Puf3_ΔTrc4	PUF3_ΔTRC4	Puf3_T4	BY4741	BY4741 PUF3::Puf3_T4-Pup2	BY4741 PUF3_T4::Puf3_T4-Pup2	This study
47	Puf3_ΔTrc5	PUF3_ΔTRC5	Puf3_T5	BY4741	BY4741 PUF3::Puf3_T5-Pup2	BY4741 PUF3_T5::Puf3_T5-Pup2	This study
48	Puf3_ΔTrc6	PUF3_ΔTRC6	Puf3_T6	BY4741	BY4741 PUF3::Puf3_T6-Pup2	BY4741 PUF3_T6::Puf3_T6-Pup2	This study
49	Puf3_ΔIDR_del465	PUF3_ΔIDR_DEL465	Puf3_T7	BY4741	BY4741 PUF3::Puf3_T7-Pup2	BY4741 PUF3_T7::Puf3_T7-Pup2	This study
50	Puf3_ΔIDR_del513	PUF3_ΔIDR_DEL513	Puf3_T7	BY4741	BY4741 PUF3::Puf3_T7-Pup2	BY4741 PUF3_T7::Puf3_T7-Pup2	This study
51	Puf3_ΔIDR_del535	PUF3_ΔIDR_DEL535	Puf3_Δnon-RBD	BY4741	BY4741 PUF3::Puf3_Δnon-RBD-Pup2	BY4741 PUF3_ΔNON-RBD::Puf3_Δnon-RBD-Pup2	This study
52	Puf3_ΔIDRMost_del	PUF3_ΔIDRMOST_DEL	Puf3_ΔIDR	BY4741	BY4741 PUF3::Puf3_ΔIDR-Pup2	BY4741 PUF3_ΔIDR::Puf3_ΔIDR-Pup2	This study
53	Pub1_ΔSecondDel	PUB1_ΔSECONDDEL	Pub1_Δ2	BY4741	BY4741 PUB1::Pub1_Δ2-Pup2	BY4741 PUB1_Δ2::Pub1_Δ2-Pup2	This study
54	Pub1_ΔFourthDel	PUB1_ΔFOURTHDEL	Pub1_Δ4	BY4741	BY4741 PUB1::Pub1_Δ4-Pup2	BY4741 PUB1_Δ4::Pub1_Δ4-Pup2	This study
55	Pub1_ΔTrc1	PUB1_ΔTRC1	Pub1_ΔT1	BY4741	BY4741 PUB1::Pub1_ΔT1-Pup2	BY4741 PUB1_ΔT1::Pub1_ΔT1-Pup2	This study
56	Pub1_ΔFirstDel	PUB1_ΔFIRSTDEL	Pub1_ΔIDR_1	BY4741	BY4741 PUB1::Pub1_ΔIDR_1-Pup2	BY4741 PUB1_ΔIDR_1::Pub1_ΔIDR_1-Pup2	This study
57	Pub1_ΔTrc6	PUB1_ΔTRC6	Pub1_T2	BY4741	BY4741 PUB1::Pub1_T2-Pup2	BY4741 PUB1_T2::Pub1_T2-Pup2	This study
58	Pub1_ΔTrc9	PUB1_ΔTRC9	Pub1_T3	BY4741	BY4741 PUB1::Pub1_T3-Pup2	BY4741 PUB1_T3::Pub1_T3-Pup2	This study
59	Pub1_ΔThirdDel	PUB1_ΔTHIRDDEL	Pub1_ΔIDR_2	BY4741	BY4741 PUB1::Pub1_ΔIDR_2-Pup2	BY4741 PUB1_ΔIDR_2::Pub1_ΔIDR_2-Pup2	This study
60	Pub1_ΔFifthDel	PUB1_ΔFIFTHDEL	Pub1_ΔIDR_3	BY4741	BY4741 PUB1::Pub1_ΔIDR_3-Pup2	BY4741 PUB1_ΔIDR_3::Pub1_ΔIDR_3-Pup2	This study
61	Nab6_ΔSecondDel	NAB6_ΔSECONDDEL	Nab6_Δ2	BY4741	BY4741 NAB6::Nab6_Δ2-Pup2	BY4741 NAB6_Δ2::Nab6_Δ2-Pup2	This study
62	Nab6_ΔFourthDel	NAB6_ΔFOURTHDEL	Nab6_Δ4	BY4741	BY4741 NAB6::Nab6_Δ4-Pup2	BY4741 NAB6_Δ4::Nab6_Δ4-Pup2	This study
63	Nab6_ΔFirstDel	NAB6_ΔFIRSTDEL	Nab6_ΔIDR_1	BY4741	BY4741 NAB6::Nab6_ΔIDR_1-Pup2	BY4741 NAB6_ΔIDR_1::Nab6_ΔIDR_1-Pup2	This study
64	Nab6_ΔFifthDel	NAB6_ΔFIFTHDEL	Nab6_ΔIDR_2	BY4741	BY4741 NAB6::Nab6_ΔIDR_2-Pup2	BY4741 NAB6_ΔIDR_2::Nab6_ΔIDR_2-Pup2	This study
65	Rie1_ΔSecondDel	RIE1_ΔSECONDDEL	Rie1_Δ2	BY4741	BY4741 RIE1::Rie1_Δ2-Pup2	BY4741 RIE1_Δ2::Rie1_Δ2-Pup2	This study
66	Rie1_ΔFourthDel	RIE1_ΔFOURTHDEL	Rie1_Δ4	BY4741	BY4741 RIE1::Rie1_Δ4-Pup2	BY4741 RIE1_Δ4::Rie1_Δ4-Pup2	This study
67	Rie1_ΔFirstDel	RIE1_ΔFIRSTDEL	Rie1_ΔIDR_1	BY4741	BY4741 RIE1::Rie1_ΔIDR_1-Pup2	BY4741 RIE1_ΔIDR_1::Rie1_ΔIDR_1-Pup2	This study
68	Rie1_ΔThirdDel	RIE1_ΔTHIRDDEL	Rie1_ΔIDR_2	BY4741	BY4741 RIE1::Rie1_ΔIDR_2-Pup2	BY4741 RIE1_ΔIDR_2::Rie1_ΔIDR_2-Pup2	This study
69	Rie1_ΔFifthDel	RIE1_ΔFIFTHDEL	Rie1_ΔIDR_3	BY4741	BY4741 RIE1::Rie1_ΔIDR_3-Pup2	BY4741 RIE1_ΔIDR_3::Rie1_ΔIDR_3-Pup2	This study
70	Puf4_ΔRBD_del	PUF4_ΔRBD_DEL	Puf4_ΔRBD	BY4741	BY4741 PUF4::Puf4_ΔRBD-Pup2	BY4741 PUF4_ΔRBD::Puf4_ΔRBD-Pup2	This study
71	Puf4_ΔTrc1	PUF4_ΔTRC1	Puf4_T1	BY4741	BY4741 PUF4::Puf4_T1-Pup2	BY4741 PUF4_T1::Puf4_T1-Pup2	This study
72	Puf4_ΔTrc2	PUF4_ΔTRC2	Puf4_T2	BY4741	BY4741 PUF4::Puf4_T2-Pup2	BY4741 PUF4_T2::Puf4_T2-Pup2	This study
73	Puf4_ΔTrc3	PUF4_ΔTRC3	Puf4_T3	BY4741	BY4741 PUF4::Puf4_T3-Pup2	BY4741 PUF4_T3::Puf4_T3-Pup2	This study
74	Puf4_ΔTrc4	PUF4_ΔTRC4	Puf4_T4	BY4741	BY4741 PUF4::Puf4_T4-Pup2	BY4741 PUF4_T4::Puf4_T4-Pup2	This study
75	Puf4_ΔIDRMost_del	PUF4_ΔIDRMOST_DEL	Puf4_ΔIDR	BY4741	BY4741 PUF4::Puf4_ΔIDR-Pup2	BY4741 PUF4_ΔIDR::Puf4_ΔIDR-Pup2	This study
76	Puf4_ΔTrc4ToRBD_del	PUF4_ΔTRC4TORBD_DEL	Puf4_T4&ΔIDR	BY4741	BY4741 PUF4::Puf4_T4&ΔIDR-Pup2	BY4741 PUF4_T4&ΔIDR::Puf4_T4&ΔIDR-Pup2	This study
77	Puf5_ΔRBDdel_W_trc3	PUF5_ΔRBDDEL_W_TRC3	Puf5_ΔRBD	BY4741	BY4741 PUF5::Puf5_ΔRBD-Pup2	BY4741 PUF5_ΔRBD::Puf5_ΔRBD-Pup2	This study
78	Puf5_ΔTrc1	PUF5_ΔTRC1	Puf5_T1	BY4741	BY4741 PUF5::Puf5_T1-Pup2	BY4741 PUF5_T1::Puf5_T1-Pup2	This study
79	Puf5_ΔTrc1WInt	PUF5_ΔTRC1WINT	Puf5_T1Δintron	BY4741	BY4741 PUF5::Puf5_T1Δintron-Pup2	BY4741 PUF5_T1ΔINTRON::Puf5_T1Δintron-Pup2	This study
80	Puf5_ΔTrc2	PUF5_ΔTRC2	Puf5_T2	BY4741	BY4741 PUF5::Puf5_T2-Pup2	BY4741 PUF5_T2::Puf5_T2-Pup2	This study
81	Puf5_ΔTrc4	PUF5_ΔTRC4	Puf5_T3	BY4741	BY4741 PUF5::Puf5_T3-Pup2	BY4741 PUF5_T3::Puf5_T3-Pup2	This study
82	Puf5_ΔCterCompIDR_del	PUF5_ΔCTERCOMPIDR_DEL	Puf5_T4	BY4741	BY4741 PUF5::Puf5_T4-Pup2	BY4741 PUF5_T4::Puf5_T4-Pup2	This study
83	Puf5_ΔTrc5	PUF5_ΔTRC5	Puf5_T5	BY4741	BY4741 PUF5::Puf5_T5-Pup2	BY4741 PUF5_T5::Puf5_T5-Pup2	This study
84	Puf5_ΔTrc6_C1_1	PUF5_ΔTRC6_C1_1	Puf5_T6	BY4741	BY4741 PUF5::Puf5_T6-Pup2	BY4741 PUF5_T6::Puf5_T6-Pup2	This study
85	Mrn1_ΔRBD_del	MRN1_ΔRBD_DEL	Mrn1_ΔRBD	BY4741	BY4741 MRN1::Mrn1_ΔRBD-Pup2	BY4741 MRN1_ΔRBD::Mrn1_ΔRBD-Pup2	This study
86	Mrn1_ΔIDR_del	MRN1_ΔIDR_DEL	Mrn1_ΔIDR	BY4741	BY4741 MRN1::Mrn1_ΔIDR-Pup2	BY4741 MRN1_ΔIDR::Mrn1_ΔIDR-Pup2	This study
87	Scp160_ΔFirstDel	SCP160_ΔFIRSTDEL	Scp160_ΔIDR_1	BY4741	BY4741 SCP160::Scp160_ΔIDR_1-Pup2	BY4741 SCP160_ΔIDR_1::Scp160_ΔIDR_1-Pup2	This study
88	Scp160_ΔThirdDel	SCP160_ΔTHIRDDEL	Scp160_ΔIDR_2	BY4741	BY4741 SCP160::Scp160_ΔIDR_2-Pup2	BY4741 SCP160_ΔIDR_2::Scp160_ΔIDR_2-Pup2	This study
89	Scp160_ΔFourthDel	SCP160_ΔFOURTHDEL	Scp160_Δ4	BY4741	BY4741 SCP160::Scp160_Δ4-Pup2	BY4741 SCP160_Δ4::Scp160_Δ4-Pup2	This study
90	Scp160_ΔFifthDel	SCP160_ΔFIFTHDEL	Scp160_ΔIDR_3	BY4741	BY4741 SCP160::Scp160_ΔIDR_3-Pup2	BY4741 SCP160_ΔIDR_3::Scp160_ΔIDR_3-Pup2	This study
91	Scp160_ΔSixthDel	SCP160_ΔSIXTHDEL	Scp160_Δ6	BY4741	BY4741 SCP160::Scp160_Δ6-Pup2	BY4741 SCP160_Δ6::Scp160_Δ6-Pup2	This study

## Sheet: Sheet1
SeqName	LookUpName	Genotype	SampleName
BFR1	BFR1	BY4741 BFR1::Bfr1-Pup2	Bfr1
DBP1	DBP1	BY4741 DBP1::Dbp1-Pup2	Dbp1
DHH1	DHH1	BY4741 DHH1::Dhh1-Pup2	Dhh1
ECM32	ECM32	BY4741 ECM32::Ecm32-Pup2	Ecm32
GBP2	GBP2	BY4741 GBP2::Gbp2-Pup2	Gbp2
MRN1	MRN1	BY4741 MRN1::Mrn1-Pup2	Mrn1
MRN1_IDR_del_C1	MRN1_ΔIDR_DEL	BY4741 MRN1::Mrn1_ΔIDR-Pup2	Mrn1_ΔIDR
MRN1_IDR_del_C2	MRN1_ΔIDR_DEL	BY4741 MRN1::Mrn1_ΔIDR-Pup2	Mrn1_ΔIDR
MRN1_RBD_del_C1	MRN1_ΔRBD_DEL	BY4741 MRN1::Mrn1_ΔRBD-Pup2	Mrn1_ΔRBD
MRN1_RBD_del_C2	MRN1_ΔRBD_DEL	BY4741 MRN1::Mrn1_ΔRBD-Pup2	Mrn1_ΔRBD
MSS116	MSS116	BY4741 MSS116::Mss116-Pup2	Mss116
NAB6	NAB6	BY4741 NAB6::Nab6-Pup2	Nab6
NAB6_FifthDel_C1_1	NAB6_ΔFIFTHDEL	BY4741 NAB6::Nab6_ΔIDR_2-Pup2	Nab6_ΔIDR_2
NAB6_FifthDel_C2_1	NAB6_ΔFIFTHDEL	BY4741 NAB6::Nab6_ΔIDR_2-Pup2	Nab6_ΔIDR_2
NAB6_FirstDel_C1_1	NAB6_ΔFIRSTDEL	BY4741 NAB6::Nab6_ΔIDR_1-Pup2	Nab6_ΔIDR_1
NAB6_FirstDel_C2_1	NAB6_ΔFIRSTDEL	BY4741 NAB6::Nab6_ΔIDR_1-Pup2	Nab6_ΔIDR_1
NAB6_FourthDel_C1	NAB6_ΔFOURTHDEL	BY4741 NAB6::Nab6_Δ4-Pup2	Nab6_Δ4
NAB6_FourthDel_C2	NAB6_ΔFOURTHDEL	BY4741 NAB6::Nab6_Δ4-Pup2	Nab6_Δ4
NAB6_SecondDel_1	NAB6_ΔSECONDDEL	BY4741 NAB6::Nab6_Δ2-Pup2	Nab6_Δ2
NAB6_SecondDel_2	NAB6_ΔSECONDDEL	BY4741 NAB6::Nab6_Δ2-Pup2	Nab6_Δ2
NAM7	NAM7	BY4741 NAM7::Nam7-Pup2	Nam7
NAM8	NAM8	BY4741 NAM8::Nam8-Pup2	Nam8
NGR1	NGR1	BY4741 NGR1::Ngr1-Pup2	Ngr1
NPL3	NPL3	BY4741 NPL3::Npl3-Pup2	Npl3
NRD1	NRD1	BY4741 NRD1::Nrd1-Pup2	Nrd1
NSR1	NSR1	BY4741 NSR1::Nsr1-Pup2	Nsr1
P3_IDR_del465	PUF3_ΔIDR_DEL465	BY4741 PUF3::Puf3_T7-Pup2	Puf3_T7
P3_IDR_del513	PUF3_ΔIDR_DEL513	BY4741 PUF3::Puf3_T7-Pup2	Puf3_T7
P3_IDR_del535	PUF3_ΔIDR_DEL535	BY4741 PUF3::Puf3_Δnon-RBD-Pup2	Puf3_Δnon-RBD
P3_IDR_del535_C1	PUF3_ΔIDR_DEL535	BY4741 PUF3::Puf3_Δnon-RBD-Pup2	Puf3_Δnon-RBD
P3_IDR_del535_C2	PUF3_ΔIDR_DEL535	BY4741 PUF3::Puf3_Δnon-RBD-Pup2	Puf3_Δnon-RBD
P3_IDRMost_del	PUF3_ΔIDRMOST_DEL	BY4741 PUF3::Puf3_ΔIDR-Pup2	Puf3_ΔIDR
P3_RBD_del535	PUF3_ΔRBD_DEL535	BY4741 PUF3::Puf3_ΔRBD-Pup2	Puf3_ΔRBD
P4_IDRMost_del	PUF4_ΔIDRMOST_DEL	BY4741 PUF4::Puf4_ΔIDR-Pup2	Puf4_ΔIDR
P4_RBD_del_C1	PUF4_ΔRBD_DEL	BY4741 PUF4::Puf4_ΔRBD-Pup2	Puf4_ΔRBD
P4_RBD_del_C2	PUF4_ΔRBD_DEL	BY4741 PUF4::Puf4_ΔRBD-Pup2	Puf4_ΔRBD
P4_Trc4ToRBD_del	PUF4_ΔTRC4TORBD_DEL	BY4741 PUF4::Puf4_T4&ΔIDR-Pup2	Puf4_T4&ΔIDR
P5_CterCompIDR_del	PUF5_ΔCTERCOMPIDR_DEL	BY4741 PUF5::Puf5_T4-Pup2	Puf5_T4
P5_RBDdel_W_trc3_C1	PUF5_ΔRBDDEL_W_TRC3	BY4741 PUF5::Puf5_ΔRBD-Pup2	Puf5_ΔRBD
P5_RBDdel_W_trc3_C2	PUF5_ΔRBDDEL_W_TRC3	BY4741 PUF5::Puf5_ΔRBD-Pup2	Puf5_ΔRBD
P5_Trc1WInt_C1	PUF5_ΔTRC1WINT	BY4741 PUF5::Puf5_T1Δintron-Pup2	Puf5_T1Δintron
P5_Trc1WInt_C2	PUF5_ΔTRC1WINT	BY4741 PUF5::Puf5_T1Δintron-Pup2	Puf5_T1Δintron
PBP1	PBP1	BY4741 PBP1::Pbp1-Pup2	Pbp1
PBP2	PBP2	BY4741 PBP2::Pbp2-Pup2	Pbp2
PIN4	PIN4	BY4741 PIN4::Pin4-Pup2	Pin4
PSP2	PSP2	BY4741 PSP2::Psp2-Pup2	Psp2
PUB1	PUB1	BY4741 PUB1::Pub1-Pup2	Pub1
PUB1_FifthDel_C1_1	PUB1_ΔFIFTHDEL	BY4741 PUB1::Pub1_ΔIDR_3-Pup2	Pub1_ΔIDR_3
PUB1_FifthDel_C2_1	PUB1_ΔFIFTHDEL	BY4741 PUB1::Pub1_ΔIDR_3-Pup2	Pub1_ΔIDR_3
PUB1_FirstDel_1	PUB1_ΔFIRSTDEL	BY4741 PUB1::Pub1_ΔIDR_1-Pup2	Pub1_ΔIDR_1
PUB1_FirstDel_2	PUB1_ΔFIRSTDEL	BY4741 PUB1::Pub1_ΔIDR_1-Pup2	Pub1_ΔIDR_1
PUB1_FourthDel_C1_1	PUB1_ΔFOURTHDEL	BY4741 PUB1::Pub1_Δ4-Pup2	Pub1_Δ4
PUB1_FourthDel_C2_1	PUB1_ΔFOURTHDEL	BY4741 PUB1::Pub1_Δ4-Pup2	Pub1_Δ4
PUB1_SecondDel_1	PUB1_ΔSECONDDEL	BY4741 PUB1::Pub1_Δ2-Pup2	Pub1_Δ2
PUB1_SecondDel_2	PUB1_ΔSECONDDEL	BY4741 PUB1::Pub1_Δ2-Pup2	Pub1_Δ2
PUB1_ThirdDel_C1_1	PUB1_ΔTHIRDDEL	BY4741 PUB1::Pub1_ΔIDR_2-Pup2	Pub1_ΔIDR_2
PUB1_ThirdDel_C1_2	PUB1_ΔTHIRDDEL	BY4741 PUB1::Pub1_ΔIDR_2-Pup2	Pub1_ΔIDR_2
PUB1_ThirdDel_C2_1	PUB1_ΔTHIRDDEL	BY4741 PUB1::Pub1_ΔIDR_2-Pup2	Pub1_ΔIDR_2
PUB1_Trc1_C1	PUB1_ΔTRC1	BY4741 PUB1::Pub1_ΔT1-Pup2	Pub1_ΔT1
PUB1_Trc1_C2	PUB1_ΔTRC1	BY4741 PUB1::Pub1_ΔT1-Pup2	Pub1_ΔT1
PUB1_Trc6	PUB1_ΔTRC6	BY4741 PUB1::Pub1_T2-Pup2	Pub1_T2
PUB1_Trc9_C2	PUB1_ΔTRC6	BY4741 PUB1::Pub1_T2-Pup2	Pub1_T2
Puf1	PUF1	BY4741 PUF1::Puf1-Pup2	Puf1
Puf2	PUF2	BY4741 PUF2::Puf2-Pup2	Puf2
Puf3_C1	PUF3	BY4741 PUF3::Puf3-Pup2	Puf3
Puf3_C2	PUF3	BY4741 PUF3::Puf3-Pup2	Puf3
Puf3_CSWAT_ctrl	PUF3_C-SWAT_CTRL	BY4741 PUF3::Puf3_C-SWAT	Puf3_C-SWAT_ctrl
Puf3_dead_C1	PUF3_DEAD	BY4741 PUF3::Puf3-deadPup2	Puf3_dead
Puf3_dead_C2	PUF3_DEAD	BY4741 PUF3::Puf3-deadPup2	Puf3_dead
Puf3_Trc1_C1	PUF3_ΔTRC1	BY4741 PUF3::Puf3_T1-Pup2	Puf3_T1
Puf3_Trc1_C2	PUF3_ΔTRC1	BY4741 PUF3::Puf3_T1-Pup2	Puf3_T1
Puf3_Trc2	PUF3_ΔTRC2	BY4741 PUF3::Puf3_T2-Pup2	Puf3_T2
Puf3_Trc3_C1	PUF3_ΔTRC3	BY4741 PUF3::Puf3_T3-Pup2	Puf3_T3
Puf3_Trc3_C2	PUF3_ΔTRC3	BY4741 PUF3::Puf3_T3-Pup2	Puf3_T3
Puf3_Trc4	PUF3_ΔTRC4	BY4741 PUF3::Puf3_T4-Pup2	Puf3_T4
Puf3_Trc5	PUF3_ΔTRC5	BY4741 PUF3::Puf3_T5-Pup2	Puf3_T5
Puf3_Trc6	PUF3_ΔTRC6	BY4741 PUF3::Puf3_T6-Pup2	Puf3_T6
Puf4_C1	PUF4	BY4741 PUF4::Puf4-Pup2	Puf4
Puf4_C1_C2	PUF4	BY4741 PUF4::Puf4-Pup2	Puf4
Puf4_CSWAT_ctrl	PUF4_C-SWAT_CTRL	BY4741 PUF4::Puf4_C-SWAT	Puf4_C-SWAT_ctrl
Puf4_dead	PUF4_DEAD	BY4741 PUF4::Puf4-deadPup2	Puf4_dead
Puf4_Trc1_C1	PUF4_ΔTRC1	BY4741 PUF4::Puf4_T1-Pup2	Puf4_T1
Puf4_Trc1_C2	PUF4_ΔTRC1	BY4741 PUF4::Puf4_T1-Pup2	Puf4_T1
Puf4_Trc2_C1	PUF4_ΔTRC2	BY4741 PUF4::Puf4_T2-Pup2	Puf4_T2
Puf4_Trc2_C2	PUF4_ΔTRC2	BY4741 PUF4::Puf4_T2-Pup2	Puf4_T2
Puf4_Trc3	PUF4_ΔTRC3	BY4741 PUF4::Puf4_T3-Pup2	Puf4_T3
Puf4_Trc4_C1	PUF4_ΔTRC4	BY4741 PUF4::Puf4_T4-Pup2	Puf4_T4
Puf5_C1	PUF5	BY4741 PUF5::Puf5-Pup2	Puf5
Puf5_C2	PUF5	BY4741 PUF5::Puf5-Pup2	Puf5
Puf5_CSWAT_ctrl	PUF5_C-SWAT_CTRL	BY4741 PUF5::Puf5_C-SWAT	Puf5_C-SWAT_ctrl
Puf5_dead	PUF5_DEAD	BY4741 PUF5::Puf5-deadPup2	Puf5_dead
Puf5_Trc1_C1	PUF5_ΔTRC1	BY4741 PUF5::Puf5_T1-Pup2	Puf5_T1
Puf5_Trc1_C2	PUF5_ΔTRC1	BY4741 PUF5::Puf5_T1-Pup2	Puf5_T1
Puf5_Trc2_C1	PUF5_ΔTRC2	BY4741 PUF5::Puf5_T2-Pup2	Puf5_T2
Puf5_Trc2_C2	PUF5_ΔTRC2	BY4741 PUF5::Puf5_T2-Pup2	Puf5_T2
Puf5_Trc4	PUF5_ΔTRC4	BY4741 PUF5::Puf5_T3-Pup2	Puf5_T3
Puf5_Trc4_C1	PUF5_ΔTRC4	BY4741 PUF5::Puf5_T3-Pup2	Puf5_T3
Puf5_Trc5_C1	PUF5_ΔTRC5	BY4741 PUF5::Puf5_T5-Pup2	Puf5_T5
Puf5_Trc5_C2	PUF5_ΔTRC5	BY4741 PUF5::Puf5_T5-Pup2	Puf5_T5
Puf5_Trc6_C1	PUF5_ΔTRC6_C1_1	BY4741 PUF5::Puf5_T6-Pup2	Puf5_T6
Puf6_C1	PUF6	BY4741 PUF6::Puf6-Pup2	Puf6
Puf6_C2	PUF6	BY4741 PUF6::Puf6-Pup2	Puf6
RAT1	RAT1	BY4741 RAT1::Rat1-Pup2	Rat1
RIE1	RIE1	BY4741 RIE1::Rie1-Pup2	Rie1
RIE1_FifthDel_C1_1	RIE1_ΔFIFTHDEL	BY4741 RIE1::Rie1_ΔIDR_3-Pup2	Rie1_ΔIDR_3
RIE1_FifthDel_C2_1	RIE1_ΔFIFTHDEL	BY4741 RIE1::Rie1_ΔIDR_3-Pup2	Rie1_ΔIDR_3
RIE1_FirstDel_1	RIE1_ΔFIRSTDEL	BY4741 RIE1::Rie1_ΔIDR_1-Pup2	Rie1_ΔIDR_1
RIE1_FirstDel_2	RIE1_ΔFIRSTDEL	BY4741 RIE1::Rie1_ΔIDR_1-Pup2	Rie1_ΔIDR_1
RIE1_FourthDel_1	RIE1_ΔFOURTHDEL	BY4741 RIE1::Rie1_Δ4-Pup2	Rie1_Δ4
RIE1_FourthDel_2	RIE1_ΔFOURTHDEL	BY4741 RIE1::Rie1_Δ4-Pup2	Rie1_Δ4
RIE1_SecondDel_1	RIE1_ΔSECONDDEL	BY4741 RIE1::Rie1_Δ2-Pup2	Rie1_Δ2
RIE1_SecondDel_2	RIE1_ΔSECONDDEL	BY4741 RIE1::Rie1_Δ2-Pup2	Rie1_Δ2
RIE1_ThirdDel_C1_1	RIE1_ΔTHIRDDEL	BY4741 RIE1::Rie1_ΔIDR_2-Pup2	Rie1_ΔIDR_2
RIE1_ThirdDel_C2_1	RIE1_ΔTHIRDDEL	BY4741 RIE1::Rie1_ΔIDR_2-Pup2	Rie1_ΔIDR_2
RMD9	RMD9	BY4741 RMD9::Rmd9-Pup2	Rmd9
SCP160	SCP160	BY4741 SCP160::Scp160-Pup2	Scp160
SCP160_FifthDel_1	SCP160_ΔFIFTHDEL	BY4741 SCP160::Scp160_ΔIDR_3-Pup2	Scp160_ΔIDR_3
SCP160_FifthDel_2	SCP160_ΔFIFTHDEL	BY4741 SCP160::Scp160_ΔIDR_3-Pup2	Scp160_ΔIDR_3
SCP160_FirstDel_C1_1	SCP160_ΔFIRSTDEL	BY4741 SCP160::Scp160_ΔIDR_1-Pup2	Scp160_ΔIDR_1
SCP160_FirstDel_C2_1	SCP160_ΔFIRSTDEL	BY4741 SCP160::Scp160_ΔIDR_1-Pup2	Scp160_ΔIDR_1
SCP160_FourthDel_1	SCP160_ΔFOURTHDEL	BY4741 SCP160::Scp160_Δ4-Pup2	Scp160_Δ4
SCP160_FourthDel_2	SCP160_ΔFOURTHDEL	BY4741 SCP160::Scp160_Δ4-Pup2	Scp160_Δ4
SCP160_SixthDel_C1_1	SCP160_ΔSIXTHDEL	BY4741 SCP160::Scp160_Δ6-Pup2	Scp160_Δ6
SCP160_SixthDel_C2_1	SCP160_ΔSIXTHDEL	BY4741 SCP160::Scp160_Δ6-Pup2	Scp160_Δ6
SCP160_ThirdDel_C1_1	SCP160_ΔTHIRDDEL	BY4741 SCP160::Scp160_ΔIDR_2-Pup2	Scp160_ΔIDR_2
SCP160_ThirdDel_C2_1	SCP160_ΔTHIRDDEL	BY4741 SCP160::Scp160_ΔIDR_2-Pup2	Scp160_ΔIDR_2
SLF1	SLF1	BY4741 SLF1::Slf1-Pup2	Slf1
SRO9_1	SRO9	BY4741 SRO9::Sro9-Pup2	Sro9
SRO9_2	SRO9	BY4741 SRO9::Sro9-Pup2	Sro9
TIS11	TIS11	BY4741 TIS11::Tis11-Pup2	Tis11
YHC1	YHC1	BY4741 YHC1::Yhc1-Pup2	Yhc1
YLL032C	YLL032C	BY4741 YLL032C::Yll032c-Pup2	Yll032c
