# Supplementary material
Source: HighWire-hosted journal article supplement (doi:10.1101/rna.080026.124)
Supplement: Supplemental_Table_S2_sumTable.xlsx [file Supplemental_Table_S2_sumTable.xlsx]

## Sheet: Sheet1
name	type (1: TF, 2: other RBP, 3: mRBP, 4: selected mRBP)	cat	domFrac	idrFrac	stretch
MBP1	1	APSES	0.0792317	0.422569	244
SWI4	1	APSES	0.0603843	0.554437	176
PHD1	1	APSES	0.125683	0.368852	47
ECM5	1	ARID/BRIGHT	0.0609497	0.037562	18
SWI1	1	ARID/BRIGHT	0.0616438	0.407154	216
ENV11	1	BED ZF	0.0523256	0.0546512	32
SWI5	1	C2H2 ZF	0.0705219	0.590973	97
ADR1	1	C2H2 ZF	0.0355253	0.197279	36
MET32	1	C2H2 ZF	0.21466	0.481675	35
MIG3	1	C2H2 ZF	0.0634518	0.598985	60
COM2	1	C2H2 ZF	0.10158	0.34763	50
RPH1	1	C2H2 ZF	0.0263819	0.409548	67
MIG1	1	C2H2 ZF	0.047619	0.912698	145
MIG2	1	C2H2 ZF	0.0602094	0.623037	59
FZF1	1	C2H2 ZF	0.083612	0.414716	57
YGR067C	1	C2H2 ZF	0.0298507	0.0335821	10
RIM101	1	C2H2 ZF	0.0336	0.3984	54
ZAP1	1	C2H2 ZF	0.0772727	0.410227	103
MSN4	1	C2H2 ZF	0.0746032	0.663492	88
ACE2	1	C2H2 ZF	0.0649351	0.719481	99
TDA9	1	C2H2 ZF	0.0175859	0.240608	88
MSN2	1	C2H2 ZF	0.0667614	0.78125	179
RGM1	1	C2H2 ZF	0.236967	0.488152	38
CRZ1	1	C2H2 ZF	0.0678466	0.675516	90
AZF1	1	C2H2 ZF	0.103939	0.803063	287
MET31	1	C2H2 ZF	0.248588	0.276836	25
CMR3	1	C2H2 ZF	0.148265	0.369085	28
YPR015C	1	C2H2 ZF	0.190283	0.242915	18
CUP2	1	Copper fist	0.173333	0.364444	56
MAC1	1	Copper fist	0.0935252	0.290168	41
HAA1	1	Copper fist	0.056196	0.716138	214
HCM1	1	Forkhead	0.148936	0.45922	58
FKH1	1	Forkhead	0.17562	0.297521	79
FKH2	1	Forkhead	0.0986079	0.592807	162
FHL1	1	Forkhead	0.0854701	0.672009	239
SRD1	1	GATA	0.149321	0.425339	28
GLN3	1	GATA	0.0479452	0.789041	160
GAT1	1	GATA	0.0666667	0.5	96
GAT4	1	GATA	0.280992	0.231405	17
GZF3	1	GATA	0.061706	0.644283	55
ASH1	1	GATA	0.0629252	0.511905	81
DAL80	1	GATA	0.126394	0.275093	38
GAT3	1	GATA	0.234043	0.0141844	2
GAT2	1	GATA	0.0589286	0.669643	64
ECM23	1	GATA	0.187166	0.336898	18
CBF2	1	GCR1	0.083682	0.170502	38
YMR111C	1	GCR1	0.194805	0.491342	70
HOT1	1	GCR1	0.108484	0.671766	189
MSN1	1	GCR1	0.206806	0.471204	162
GCR1	1	GCR1	0.0917197	0.375796	236
HSF1	1	HSF	0.120048	0.761104	320
MGA1	1	HSF	0.243421	0.550439	118
SKN7	1	HSF	0.163987	0.44373	123
HMS2	1	HSF	0.248603	0.00558659	2
SFL1	1	HSF	0.184073	0.650131	122
HMLALPHA2	1	Homeodomain	0.257143	0.0714286	6
MATALPHA2	1	Homeodomain	0.257143	0.0714286	6
HMRA2	1	Homeodomain	0.453782	0.134454	9
PHO2	1	Homeodomain	0.101968	0.545617	86
YHP1	1	Homeodomain	0.161473	0.541076	38
TOS8	1	Homeodomain	0.144928	0.434783	35
YOX1	1	Homeodomain	0.148052	0.753247	152
CUP9	1	Homeodomain	0.130719	0.506536	51
HMRA1	1	Homeodomain	0.420635	0.0793651	4
SMP1	1	MADS box	0.106195	0.59292	33
ARG80	1	MADS box	0.265537	0.666667	87
MCM1	1	MADS box	0.167832	0.821678	200
RLM1	1	MADS box	0.0710059	0.868343	330
NHP10	1	MATalpha_HMGbox	0.320197	0.320197	45
HMO1	1	MATalpha_HMGbox	0.296748	0.317073	68
IXR1	1	MATalpha_HMGbox	0.224456	0.763819	196
ABF2	1	MATalpha_HMGbox	0.73224	0.0437158	5
NHP6A	1	MATalpha_HMGbox	0.741935	0.215054	20
ROX1	1	MATalpha_HMGbox	0.201087	0.720109	51
NHP6B	1	MATalpha_HMGbox	0.69697	0.292929	26
TOD6	1	Myb/SANT	0.0857143	0.739048	68
SNT1	1	Myb/SANT	0.0350734	0.695759	376
DOT6	1	Myb/SANT	0.0671642	0.798507	191
BAS1	1	Myb/SANT	0.107275	0.701603	250
RAP1	1	Myb/SANT	0.220073	0.464329	145
TBF1	1	Myb/SANT	0.0978648	0.275801	67
FAP1	1	NFX	0.11399	0.065285	19
NDT80	1	Ndt80/PhoG	0.365231	0.22807	87
RFX1	1	RFX	0.0949445	0.347719	97
STE12	1	STE	0.159884	0.56686	69
SPT15	1	TBP	0.691667	0.195833	41
TEC1	1	TEA	0.135802	0.320988	33
VHR2	1	VHR1	0.176238	0.30099	45
VHR1	1	VHR1	0.139063	0.242188	58
OAF1	1	Zinc cluster	0.034384	0.151862	45
PDR3	1	Zinc cluster	0.0358607	0.0993852	35
SEF1	1	Zinc cluster	0.0365854	0.454704	186
EDS1	1	Zinc cluster	0.0446137	0.208923	53
TBS1	1	Zinc cluster	0.0319927	0.244973	149
ERT1	1	Zinc cluster	0.073724	0.240076	47
THI2	1	Zinc cluster	0.0822222	0.108889	19
MAL33	1	Zinc cluster	0.0790598	0.0042735	2
RDS1	1	Zinc cluster	0.0420673	0.00360577	3
UGA3	1	Zinc cluster	0.0738636	0.0265152	13
LYS14	1	Zinc cluster	0.0468354	0.273418	83
UME6	1	Zinc cluster	0.041866	0.911483	248
UPC2	1	Zinc cluster	0.0361446	0.460022	113
RSC3	1	Zinc cluster	0.0384181	0.134463	38
ARO80	1	Zinc cluster	0.0431579	0.218947	36
URC2	1	Zinc cluster	0.0479275	0.164508	39
TOG1	1	Zinc cluster	0.0453401	0.00125945	1
ZNF1	1	Zinc cluster	0.0795699	0.0215054	4
PDR1	1	Zinc cluster	0.0318352	0.210674	74
MAL13	1	Zinc cluster	0.0782241	0.0169133	4
RSC30	1	Zinc cluster	0.0373726	0.141563	50
STB5	1	Zinc cluster	0.0484522	0.294751	112
ASG1	1	Zinc cluster	0.0383817	0.353734	222
DAL81	1	Zinc cluster	0.0350515	0.416495	172
SIP4	1	Zinc cluster	0.0458384	0.0591074	22
GSM1	1	Zinc cluster	0.0647249	0.294498	31
YJL206C	1	Zinc cluster	0.0488127	0.126649	19
PUT3	1	Zinc cluster	0.0367722	0.244127	56
RGT1	1	Zinc cluster	0.034188	0.499145	166
YKL222C	1	Zinc cluster	0.0510638	0.0907801	25
OAF3	1	Zinc cluster	0.0440324	0.0637312	45
YLL054C	1	Zinc cluster	0.0403321	0.0237248	16
PPR1	1	Zinc cluster	0.0409292	0.123894	23
CHA4	1	Zinc cluster	0.0524691	0.17284	60
ECM22	1	Zinc cluster	0.0479115	0.479115	83
HAP1	1	Zinc cluster	0.0226365	0.442077	133
PDR8	1	Zinc cluster	0.0499287	0.0328103	20
YLR278C	1	Zinc cluster	0.0231171	0.495153	293
LEU3	1	Zinc cluster	0.0451467	0.256208	114
ARG81	1	Zinc cluster	0.0454545	0.196591	51
STB4	1	Zinc cluster	0.0347734	0.252898	57
CEP3	1	Zinc cluster	0.0559211	0.0180921	7
CAT8	1	Zinc cluster	0.02582	0.394976	152
YNR063W	1	Zinc cluster	0.062603	0.0362438	8
HAL9	1	Zinc cluster	0.0368932	0.194175	81
YRR1	1	Zinc cluster	0.0444444	0.148148	38
YRM1	1	Zinc cluster	0.0470738	0.0839695	33
TEA1	1	Zinc cluster	0.0487484	0.172596	62
PIP2	1	Zinc cluster	0.0361446	0.119478	57
RDR1	1	Zinc cluster	0.0604396	0.120879	42
GAL4	1	Zinc cluster	0.0442679	0.15437	30
YPR196W	1	Zinc cluster	0.0787234	0	0
RTG3	1	bHLH	0.121399	0.687243	108
PHO4	1	bHLH	0.182692	0.711538	92
CBF1	1	bHLH	0.136752	0.766382	222
RTG1	1	bHLH	0.474576	0.282486	15
HMS1	1	bHLH	0.172811	0.559908	76
TYE7	1	bHLH	0.295533	0.364261	22
YAP6	1	bZIP	0.151436	0.681462	125
YAP2	1	bZIP	0.110024	0.283619	53
ACA1	1	bZIP	0.124744	0.447853	64
YAP3	1	bZIP	0.172727	0.306061	47
CST6	1	bZIP	0.100511	0.752981	145
YAP1	1	bZIP	0.06	0.656923	133
SKO1	1	bZIP	0.0803709	0.76507	131
YAP7	1	bZIP	0.228571	0.653061	128
YAP4	1	bZIP	0.2	0.555932	45
MAK5	2	dead	0.401035	0.226391	36
DBP10	2	dead	0.263317	0.362814	89
SUB2	2	dead	0.621076	0.121076	53
SPB4	2	dead	0.488449	0.019802	4
MRH4	2	dead	0.606061	0.0944742	44
DBP3	2	dead	0.535373	0.152964	56
ROK1	2	dead	0.507092	0.207447	57
RRP3	2	dead	0.55489	0.215569	53
DBP8	2	dead	0.656613	0.109049	28
HCA4	2	dead	0.366234	0.332468	114
TIF2	2	dead	0.688608	0.0101266	2
DHR2	2	dead	0.597279	0.0829932	31
DBP7	2	dead	0.365229	0.221024	100
TIF1	2	dead	0.688608	0.0101266	2
PRP16	2	dead	0.421102	0.151261	43
DRS1	2	dead	0.359043	0.378989	112
ECM16	2	dead	0.385162	0.248619	71
HAS1	2	dead	0.550495	0.116832	43
PRP2	2	dead	0.51484	0.194064	122
DBP6	2	dead	0.467409	0.227345	97
DBP5	2	dead	0.570539	0.141079	59
PRP28	2	dead	0.503401	0.170068	60
MRPL3	2	dsrm	0.158974	0.0025641	1
RNT1	2	dsrm	0.135881	0.184713	30
EFT2	2	eftu	0.478622	0.0190024	8
EFT1	2	eftu	0.478622	0.0190024	8
KRR1	2	kh	0.256329	0.161392	27
RRP4	2	kh	0.116992	0.175487	27
RPS3	2	kh	0.308333	0.133333	22
RRP40	2	kh	0.2	0	0
PNO1	2	kh	0.266423	0.339416	54
LSM2	2	lsm	0.684211	0.0315789	3
LSM6	2	lsm	0.802326	0.0348837	3
SMB1	2	lsm	0.438776	0.479592	93
LSM4	2	lsm	0.40107	0.529412	99
LSM5	2	lsm	0.784946	0.0215054	2
LSM8	2	lsm	0.568807	0	0
SMD2	2	lsm	0.581818	0	0
LSM7	2	lsm	0.652174	0.191304	22
SME1	2	lsm	0.776596	0	0
SMX3	2	lsm	0.755814	0.0348837	3
MAK31	2	lsm	0.704545	0	0
SMX2	2	lsm	0.857143	0	0
LSM3	2	lsm	0.797753	0.0449438	4
NMD2	2	mif4g	0.575758	0.201102	174
SGD1	2	mif4g	0.226919	0.31257	171
IRC3	2	other	0.150943	0.00580552	2
PRP22	2	other	0.324017	0.157205	54
THO1	2	other	0.155963	0.825688	129
TAN1	2	other	0.543253	0.186851	23
RPL26B	2	other	0.244094	0.0787402	6
RNH70	2	other	0.264014	0.0940325	24
RPS4B	2	other	0.130268	0.0421456	5
SUI2	2	other	0.246711	0.0855263	23
RPS4A	2	other	0.130268	0.0421456	5
YSH1	2	other	0.0667522	0.071887	20
RPL26A	2	other	0.244094	0.0787402	6
DIS3	2	other	0.152847	0.046953	24
SUV3	2	other	0.139756	0.0122117	4
PRO1	2	pua	0.205607	0.0303738	6
YHR033W	2	pua	0.208038	0.0591017	11
TMA20	2	pua	0.447514	0	0
MUD1	2	rrm	0.208054	0.147651	24
LHP1	2	rrm	0.385455	0.258182	48
CWC2	2	rrm	0.141593	0.185841	23
TIF35	2	rrm	0.233577	0.386861	52
PES4	2	rrm	0.322422	0.101473	29
MIP6	2	rrm	0.306525	0.0940819	31
SGN1	2	rrm	0.276	0.536	49
IST3	2	rrm	0.47973	0	0
MSL1	2	rrm	0.720721	0.162162	18
YRA2	2	rrm	0.325123	0.522167	67
RNP1	2	rrm	0.285141	0.15261	16
PRP24	2	rrm	0.648649	0.114865	23
YME2	2	rrm	0.0788235	0.0917647	29
NOP15	2	rrm	0.318182	0.422727	83
NOP13	2	rrm	0.176179	0.523573	92
CUS2	2	rrm	0.273684	0.217544	33
NOP12	2	rrm	0.145969	0.48366	60
HSH49	2	rrm	0.624413	0	0
PRT1	2	rrm	0.0720839	0.00917431	3
CBC2	2	rrm	0.336538	0.221154	35
PRP9	2	zf-rna	0.0490566	0.154717	27
PRP11	2	zf-rna	0.0902256	0.195489	20
AIR2	2	zf-rna	0.148256	0.55814	141
NCS6	2	zf-rna	0.0891365	0.00557103	2
YTH1	2	zf-rna	0.115385	0.0913462	19
PZF1	2	zf-rna	0.219114	0.200466	25
DHH1	4	dead	0.539526	0.233202	68
FAL1	3	dead	0.691729	0	0
MSS116	4	dead	0.448795	0.150602	47
PRP43	3	dead	0.598435	0.116037	73
SLH1	3	dead	0.29334	0.00813421	6
MTR4	3	dead	0.238583	0.16123	137
DBP9	3	dead	0.574074	0.131313	36
SKI2	3	dead	0.205905	0.192696	64
YLR419W	3	dead	0.349129	0.134495	60
DBP2	3	dead	0.514652	0.267399	66
DED1	3	dead	0.488411	0.331126	60
DBP1	4	dead	0.47812	0.314425	69
SUP35	3	eftu	0.579562	0.351825	100
HEK2	3	kh	0.498688	0.244094	27
PBP2	4	kh	0.455206	0.188862	64
SCP160	4	kh	0.36252	0.146481	61
MSL5	3	kh	0.0966387	0.504202	163
MER1	3	kh	0.274074	0.0185185	5
SRO9	4	la	0.135945	0.709677	251
SLF1	4	la	0.134228	0.58613	210
SMD1	3	lsm	0.636986	0.205479	30
LSM1	3	lsm	0.383721	0.168605	23
SMD3	3	lsm	0.633663	0.168317	14
SCD6	3	lsm	0.217765	0.773639	268
TIF4632	3	mif4g	0.26477	0.648796	268
TIF4631	3	mif4g	0.256303	0.688025	321
STO1	3	mif4g	0.749129	0.0116144	6
PUF6	4	none	0	0.190549	120
ECM32	4	none	0	0.267618	259
RMD9	4	none	0	0.0866873	23
YLL032C	4	none	0	0.0727273	38
PSP2	4	none	0	0.762226	308
NAM7	4	none	0	0.0720906	16
RAT1	4	none	0	0.267396	70
BFR1	4	none	0	0.36383	24
SSD1	3	ob	0.0608	0.404	343
PHO92	3	other	0.447712	0.212418	37
NUG1	3	other	0.169231	0.275	55
LSG1	3	other	0.0859375	0.25625	34
PBP1	4	other	0.113573	0.627424	88
RRP5	3	other	0.125506	0.137652	55
BRE5	3	other	0.258252	0.574757	252
CBF5	3	pua	0.151139	0.246377	106
PUF4	4	puf	0.233108	0.537162	168
MPT5	4	puf	0.189756	0.43539	168
JSN1	4	puf	0.0907424	0.500458	165
PUF3	4	puf	0.25711	0.435722	199
PUF2	4	puf	0.107907	0.455814	201
PIN4	4	rrm	0.106287	0.678144	162
NGR1	4	rrm	0.203869	0.517857	42
GBP2	4	rrm	0.482436	0.358314	63
WHI4	3	rrm	0.11094	0.50077	43
YRA1	3	rrm	0.287611	0.579646	61
NPL3	4	rrm	0.311594	0.623188	126
PAB1	3	rrm	0.478336	0.282496	59
RRT5	3	rrm	0.273356	0.318339	59
RNA15	3	rrm	0.239865	0.222973	36
NSR1	4	rrm	0.338164	0.647343	169
RIE1	4	rrm	0.177977	0.267606	41
RIM4	3	rrm	0.168303	0.545582	88
SBP1	3	rrm	0.255102	0.418367	27
NAM8	4	rrm	0.260038	0.151052	20
PRP8	3	rrm	0.0377124	0.0895151	143
SNP1	3	rrm	0.193333	0.35	36
NAB6	4	rrm	0.358907	0.338624	136
HRB1	3	rrm	0.453744	0.42511	136
PUB1	4	rrm	0.448124	0.470199	100
WHI3	3	rrm	0.110439	0.582451	142
NRD1	4	rrm	0.0973913	0.464348	108
HRP1	3	rrm	0.245318	0.717228	157
NOP4	3	rrm	0.289051	0.340146	62
MEX67	3	rrm	0.116861	0.140234	32
MRN1	4	rrm	0.0735294	0.279412	64
NAB3	3	rrm	0.0710723	0.746883	255
MRD1	3	rrm	0.361894	0.366404	102
NRP1	3	zf-rna	0.0820584	0.394993	123
CTH1	3	zf-rna	0.16	0.316923	32
NAB2	3	zf-rna	0.184762	0.47619	154
TIS11	4	zf-rna	0.182456	0.361404	36
YHC1	4	zf-rna	0.164502	0.532468	46
GIS2	3	zf-rna	0.75817	0	0
