# Supplementary material
Source: HighWire-hosted journal article supplement (doi:10.1101/rna.080026.124)
Supplement: Supplemental_Table_S3_RBDPfam.xlsx [file Supplemental_Table_S3_RBDPfam.xlsx]

## Sheet: Sheet1
descriptionD	display_nameD	display_nameS	det	id	rbd	rbdOld	any	Type	typeName
DEAD/DEAH box helicase	PF00270	Pfam	Members of this family include the DEAD and DEAH box helicases. Helicases are involved in unwinding nucleic acids. The DEAD box helicases are involved in various aspects of RNA metabolism, including nuclear transcription, pre mRNA splicing, ribosome biogenesis, nucleocytoplasmic transport, translation, RNA decay and organellar gene expression.	DEAD	1	1	1	1	dead
Double-stranded RNA binding motif	PF00035	Pfam	Sequences gathered for seed by HMM_iterative_training Putative motif shared by proteins that bind to dsRNA. At least some DSRM proteins seem to bind to specific RNA targets. Exemplified by Staufen, which is involved in localisation of at least five different mRNAs in the early Drosophila embryo. Also by interferon-induced protein kinase in humans, which is part of the cellular response to dsRNA.	dsrm	1	0	1	2	dsrm
Elongation factor Tu GTP binding domain	PF00009	Pfam	This domain contains a P-loop motif, also found in several other families such as Pfam:PF00071, Pfam:PF00025 and Pfam:PF00063. Elongation factor Tu consists of three structural domains, this plus two C-terminal beta barrel domains.	GTP_EFTU	1	0	1	3	eftu
Elongation factor Tu domain 2	PF03144	Pfam	Elongation factor Tu consists of three structural domains, this is the second domain. This domain adopts a beta barrel structure. This the second domain is involved in binding to charged tRNA [1]. This domain is also found in other proteins such as elongation factor G and translation initiation factor IF-2. This domain is structurally related to Pfam:PF03143, and in fact has weak sequence matches…	GTP_EFTU_D2	1	0	1	3	eftu
Elongation factor Tu C-terminal domain	PF03143	Pfam	Elongation factor Tu consists of three structural domains, this is the third domain. This domain adopts a beta barrel structure. This the third domain is involved in binding to both charged tRNA [1] and binding to EF-Ts Pfam:PF00889 [2].	GTP_EFTU_D3	1	0	1	3	eftu
Helicase associated domain (HA2)	PF04408	Pfam	This presumed domain is about 90 amino acid residues in length. It is found is a diverse set of RNA helicases. Its function is unknown, however it seems likely to be involved in nucleic acid binding.	HA2	1	0	1	13	other
Helicase conserved C-terminal domain	PF00271	Pfam	The Prosite family is restricted to DEAD/H helicases, whereas this domain family is found in a wide variety of helicases and helicase related proteins. It may be that this is not an autonomously folding unit, but an integral part of the helicase.	Helicase_C	0	1	1	13	other
KH domain	PF00013	Pfam	KH motifs bind RNA in vitro. Autoantibodies to Nova, a KH domain protein, cause paraneoplastic opsoclonus ataxia.	KH_1	1	1	1	4	kh
KH domain	PF07650	Pfam		KH_2	1	1	1	4	kh
KH domain	PF15985	Pfam	KH motifs bind RNA in vitro. Auto-antibodies to Nova, a KH domain protein, cause para-neoplastic opsoclonus ataxia.	KH_6	1	1	1	4	kh
Krr1 KH1 domain	PF17903	Pfam	This entry represents the first KH domain in the KRR1 protein [1]. Krr1 is a ribosomal assembly factor. The KH1 domain is a divergent KH domain that lacks the RNA-binding GXXG motif and is involved in binding another assembly factor, Kri1 [1].	KH_8	1	0	1	4	kh
KOW motif	PF00467	Pfam	This family has been extended to coincide with ref [1]. The KOW (Kyprides, Ouzounis, Woese) motif is found in a variety of ribosomal proteins and NusG.	KOW	1	0	1	13	other
La domain	PF05383	Pfam	This presumed domain is found at the N-terminus of La RNA-binding proteins as well as other proteins [1]. The function of this region is uncertain.	La	0	1	1	5	la
LSM domain	PF01423	Pfam	The LSM domain contains Sm proteins as well as other related LSM (Like Sm) proteins. The U1, U2, U4/U6, and U5 small nuclear ribonucleoprotein particles (snRNPs) involved in pre-mRNA splicing contain seven Sm proteins (B/B', D1, D2, D3, E, F and G) in common, which assemble around the Sm site present in four of the major spliceosomal small nuclear RNAs. The U6 snRNP binds to the LSM (Like Sm) pro…	LSM	1	1	1	6	lsm
Scd6-like Sm domain	PF12701	Pfam	The Scd6-like Sm domain is found in Scd6p from S. cerevisiae, Rap55 from the newt Pleurodeles walt, and its orthologs from fungi, animals, plants and apicomplexans [1]. The domain is also found in Dcp3p and the human EDC3/FLJ21128 protein where it is fused to the the Rossmanoid YjeF-N domain [1,2]. In addition both EDC3 and Scd6p are found fused to the FDF domain [1,2].	LSM14	1	0	1	6	lsm
MIF4G domain	PF02854	Pfam	MIF4G is named after Middle domain of eukaryotic initiation factor 4G (eIF4G). Also occurs in NMD2p and CBP80. The domain is rich in alpha-helices and may contain multiple alpha-helical repeats. In eIF4G, this domain binds eIF4A, eIF3, RNA and DNA [1].	MIF4G	1	0	1	7	mif4g
MIF4G like	PF09088	Pfam	Members of this family are involved in mediating U snRNA export from the nucleus. They adopt a highly helical structure, wherein the polypeptide chain forms a right-handed solenoid. At the tertiary level, the domain is composed of a superhelical arrangement of successive antiparallel pairs of helices [1].	MIF4G_like	1	0	1	7	mif4g
MIF4G like	PF09090	Pfam	Members of this family are involved in mediating U snRNA export from the nucleus. They adopt a highly helical structure, wherein the polypeptide chain forms a right-handed solenoid. At the tertiary level, the domain is composed of a superhelical arrangement of successive antiparallel pairs of helices [1].	MIF4G_like_2	1	0	1	7	mif4g
50S ribosome-binding GTPase	PF01926	Pfam	The full-length GTPase protein is required for the complete activity of the protein of interacting with the 50S ribosome and binding of both adenine and guanine nucleotides, with a preference for guanine nucleotide.	MMR_HSR1	1	0	1	13	other
Nuclear polyadenylated RNA-binding 2 protein CCCH zinc finger 1	PF18260	Pfam	This domain is found in nuclear polyadenylated RNA-binding 2 protein (Nab2p) present in Saccharomyces cerevisiae. Nab2p is a major family of Poly A-binding proteins whose interactions are thought to be crucial for the control of poly(A) tail length. This domain is the first of seven CCCH zinc fingers which are responsible for polyadenosine RNA binding. When combined with the next three zinc finge…	Nab2p_Zf1	0	1	1	13	other
RNA-recognition motif	PF10567	Pfam	This conserved domain is found in fungal proteins and appears to be involved in RNA-processing. It binds to poly-adenylated RNA, interacts genetically with mRNA 3'-end processing factors, copurifies with the nuclear cap-binding protein Cbp20p, and is found in complexes containing other translation factors, such as EIF4G as in Swiss:P39935 and Swiss:P39936.	Nab6_mRNP_bdg	0	1	1	13	other
Nuclear transport factor 2 (NTF2) domain	PF02136	Pfam	This family includes the NTF2-like Delta-5-3-ketosteroid isomerase proteins.	NTF2	1	0	1	13	other
Dis3-like cold-shock domain 2 (CSD2)	PF17849	Pfam	This domain has an OB fold and is found in the Dis3l2 protein [1]. This domain along with CSD1 binds to RNA.	OB_Dis3	0	1	1	8	ob
Oligonucleotide/oligosaccharide-binding (OB)-fold	PF07717	Pfam	This family is found towards the C-terminus of the DEAD-box helicases (Pfam:PF00270). In these helicases it is apparently always found in association with Pfam:PF04408. There do seem to be a couple of instances where it occurs by itself - e.g. Swiss:Q84VZ2. The structure PDB:3i4u adopts an OB-fold. helicases (Pfam:PF00270). In these helicases it is apparently always found in association with Pfam…	OB_NTP_bind	1	1	1	8	ob
PUA domain	PF01472	Pfam	The PUA domain named after Pseudouridine synthase and Archaeosine transglycosylase, was detected in archaeal and eukaryotic pseudouridine synthases, archaeal archaeosine synthases, a family of predicted ATPases that may be involved in RNA modification, a family of predicted archaeal and bacterial rRNA methylases. Additionally, the PUA domain was detected in a family of eukaryotic proteins that al…	PUA	0	1	1	9	pua
Pumilio-family RNA binding repeat	PF00806	Pfam	Puf repeats (aka PUM-HD, Pumilio homology domain) are necessary and sufficient for sequence specific RNA binding in fly Pumilio and worm FBF-1 and FBF-2. Both proteins function as translational repressors in early embryonic development by binding sequences in the 3' UTR of target mRNAs (e.g. the nanos response element (NRE) in fly Hunchback mRNA, or the point mutation element (PME) in worm fem-3 …	PUF	0	1	1	10	puf
Zn-dependent metallo-hydrolase RNA specificity domain	PF07521	Pfam	The metallo-beta-lactamase fold contains five sequence motifs. The first four motifs are found in Pfam:PF00753 and are common to all metallo-beta-lactamases. This, the fifth motif [1], appears to be specific to Zn-dependent metallohydrolases such as ribonuclease J 2 [4] which are involved in the processing of mRNA [2,3]. This domain adds essential structural elements to the CASP-domain and is uni…	RMMBL	0	1	1	13	other
Exonuclease	PF00929	Pfam	This family includes a variety of exonuclease proteins, such as ribonuclease T and the epsilon subunit of DNA polymerase III.;	RNase_T	1	0	1	13	other
Putative RRM domain	PF10378	Pfam	This is a putative RRM, RNA-binding, domain found only in fungi. It occurs in proteins annotated as Nrd1 yeast proteins, which are known to carry RRM domains. It is not homologous with any of the other RRM domains, eg RRM_1 Pfam:PF00076.	RRM	1	0	1	11	rrm
RNA recognition motif. (a.k.a. RRM, RBD, or RNP domain)	PF00076	Pfam	The RRM motif is probably diagnostic of an RNA binding protein. RRMs are found in a variety of RNA binding proteins, including various hnRNP proteins, proteins implicated in regulation of alternative splicing, and protein components of snRNPs. The motif also appears in a few single stranded DNA binding proteins. The RRM structure consists of four strands and two helices arranged in an alpha/beta …	RRM_1	1	1	1	11	rrm
RNA recognition motif of the spliceosomal PrP8	PF10598	Pfam	The large RNA-protein complex of the spliceosome catalyses pre-mRNA splicing. One of the most conserved core proteins is PrP8 which occupies a central position in the catalytic core of the spliceosome, and has been implicated in several crucial molecular rearrangements that occur there, and has recently come under the spotlight for its role in the inherited human disease, Retinitis Pigmentosa [1]…	RRM_4	1	1	1	11	rrm
RNA recognition motif. (a.k.a. RRM, RBD, or RNP domain)	PF13893	Pfam	The RRM motif is probably diagnostic of an RNA binding protein. RRMs are found in a variety of RNA binding proteins, including various hnRNP proteins, proteins implicated in regulation of alternative splicing, and protein components of snRNPs. The motif also appears in a few single stranded DNA binding proteins.	RRM_5	1	1	1	11	rrm
RNA recognition motif	PF18444	Pfam	The Mex67-Mtr2 complex (TAP-p15 or NXF1-NXT1 in metazoans) is the principal mRNA export factor in Saccharomyces cerevisiae. Mex67 is a member of the NXF family of proteins and has conserved homologs through eukaryotes from yeast to humans. Although sequence conservation is poor between S. cerevisiae Mex67 and Homo sapiens NXF1, they do show functional complementarity. Mex67 and TAP/NXF1 are modul…	RRM_9	1	1	1	11	rrm
Occluded RNA-recognition motif	PF16842	Pfam	This family is an unusual, usually C-terminal, RNA-recognition motif found in fungi. In yeast it is the fourth RRM domain on the essential splicing factor Prp24. Structurally, it has a non-canonical RRM fold with the expected beta-aloha-beta-beta-alpha-beta RRM-fold is flanked by N- and C-terminal alpha-helices. These two additional flanking alpha-helices occlude the beta-sheet face. The electrop…	RRM_occluded	1	0	1	11	rrm
S1 domain	PF17215	Pfam	This domain corresponds to the S1 domain found at the C-terminus of ribonucleases such as yeast Rrp44 [1].	Rrp44_S1	0	1	1	13	other
S1 RNA binding domain	PF00575	Pfam	The S1 domain occurs in a wide range of RNA associated proteins. It is structurally similar to cold shock protein which binds nucleic acids. The S1 domain has an OB-fold structure.	S1	0	1	1	13	other
SAP domain	PF02037	Pfam	The SAP (after SAF-A/B, Acinus and PIAS) motif is a putative DNA/RNA binding domain found in diverse nuclear and cytoplasmic proteins.	SAP	1	0	1	13	other
Ataxin 2 SM domain	PF14438	Pfam	This SM domain is found in Ataxin-2 [1].	SM-ATX	0	1	1	13	other
THUMP domain	PF02926	Pfam	The THUMP domain is named after after thiouridine synthases, methylases and PSUSs [1]. The THUMP domain consists of about 110 amino acid residues. The structure of ThiI reveals that the THUMP has a fold unlike that of previously characterised RNA-binding domains [2]. It is predicted that this domain is an RNA-binding domain The THUMP domain probably functions by delivering a variety of RNA modifi…	THUMP	0	1	1	13	other
YT521-B-like domain	PF04146	Pfam	A protein of the YTH family has been shown to selectively remove transcripts of meiosis-specific genes expressed in mitotic cells [3]. It has been speculated that in higher eukaryotic YTH-family members may be involved in similar mechanisms to suppress gene regulation during gametogenesis or general silencing. The rat protein Swiss:Q9QY02 YT521-B is a tyrosine-phosphorylated nuclear protein, that…	YTH	0	1	1	13	other
Zinc finger, C2H2 type	PF00096	Pfam	The C2H2 zinc finger is the classical zinc finger domain. The two conserved cysteines and histidines co-ordinate a zinc ion. The following pattern describes the zinc finger. #-X-C-X(1-5)-C-X3-#-X5-#-X2-H-X(3-6)-[H/C] Where X can be any amino acid, and numbers in brackets indicate the number of residues. The positions marked # are those that are important for the stable fold of the zinc finger. Th…	zf-C2H2	0	1	1	12	zf-rna
C2H2-type zinc finger	PF13894	Pfam	This family contains a number of divergent C2H2 type zinc fingers.	zf-C2H2_4	0	1	1	12	zf-rna
Zinc-finger double-stranded RNA-binding	PF12171	Pfam	This domain family is found in archaea and eukaryotes, and is approximately 30 amino acids in length. The mammalian members of this group occur multiple times along the protein, joined by flexible linkers, and are referred to as JAZ - dsRNA-binding ZF protein - zinc-fingers. The JAZ proteins are expressed in all tissues tested and localise in the nucleus, particularly the nucleolus. JAZ preferent…	zf-C2H2_jaz	1	1	1	12	zf-rna
Zinc finger C-x8-C-x5-C-x3-H type (and similar)	PF00642	Pfam		zf-CCCH	1	1	1	12	zf-rna
RNA-binding, Nab2-type zinc finger	PF14608	Pfam	This is an unusual zinc-finger family, and is represented by fingers 5-7 of Nab2. Nab2 ZnF5-7 are zinc-fingers of the type C-x8-C-x5-C-x3-H. Nab2 ZnFs function in the generation of export-competent mRNPs. Mab2 is a conserved polyadenosine-RNA-binding Zn finger protein required for both mRNA export and polyadenylation regulation and becomes attached to the mRNP after splicing and during or immedia…	zf-CCCH_2	1	1	1	12	zf-rna
Zinc knuckle	PF00098	Pfam	The zinc knuckle is a zinc binding motif composed of the the following CX2CX4HX4C where X can be any amino acid. The motifs are mostly from retroviral gag proteins (nucleocapsid). Prototype structure is from HIV. Also contains members involved in eukaryotic gene regulation, such as C. elegans GLH-1. Structure is an 18-residue zinc finger.	zf-CCHC	1	1	1	12	zf-rna
Zinc-finger of C2H2 type	PF12874	Pfam	This is a zinc-finger domain with the CxxCx(12)Hx(6)H motif, found in multiple copies in a wide range of proteins from plants to metazoans. Some member proteins, particularly those from plants, are annotated as being RNA-binding.	zf-met	0	1	1	12	zf-rna
Zn-finger in Ran binding protein and others	PF00641	Pfam		zf-RanBP	1	1	1	12	zf-rna
U1 zinc finger	PF06220	Pfam	This family consists of several U1 small nuclear ribonucleoprotein C (U1-C) proteins. The U1 small nuclear ribonucleoprotein (U1 snRNP) binds to the pre-mRNA 5' splice site (ss) at early stages of spliceosome assembly. Recruitment of U1 to a class of weak 5' ss is promoted by binding of the protein TIA-1 to uridine-rich sequences immediately downstream from the 5' ss. Binding of TIA-1 in the vici…	zf-U1	0	1	1	12	zf-rna
Zinc-ribbon	PF16503	Pfam	This is a family of zinc-ribbons largely from eukaryotes that lie at the C-terminus of cytoplasmic tRNA adenylyltransferase 1 proteins. Most of these proteins carry an ATP-binding domain towards the N-terminus.	zn-ribbon_14	0	1	1	12	zf-rna
