# Supplementary material
Source: HighWire-hosted journal article supplement (doi:10.1101/rna.080026.124)
Supplement: Supplemental_Table_S4_DBDPfam.xlsx [file Supplemental_Table_S4_DBDPfam.xlsx]

## Sheet: Sheet1
descriptionD	display_nameD	display_nameS	dbd	type	typeName
KilA-N domain	PF04383	Pfam	1	4	APSES
Helix-loop-helix DNA-binding domain	PF00010	Pfam	1	6	bHLH
Basic region leucine zipper	PF07716	Pfam	1
bZIP transcription factor	PF00170	Pfam	1	7	bZIP
Zinc finger, C2H2 type	PF00096	Pfam	1	8	C2H2 ZF
Copper fist DNA binding domain	PF00649	Pfam	1	10	Copper fist
Forkhead domain	PF00250	Pfam	1	11	Forkhead
GATA zinc finger	PF00320	Pfam	1	12	GATA
Transcriptional activator of glycolytic enzymes	PF12550	Pfam	1	13	GCR1
Homeodomain	PF00046	Pfam	1	14	Homeodomain
Homeobox KN domain	PF05920	Pfam	1	14	Homeodomain
HSF-type DNA-binding	PF00447	Pfam	1	15	HSF
SRF-type transcription factor (DNA-binding and dimerisation domain)	PF00319	Pfam	1	16	MADS box
HMG (high mobility group) box	PF00505	Pfam	1	17	MATalpha_HMGbox
Myb-like DNA-binding domain	PF00249	Pfam	1	18	Myb/SANT
NDT80 / PhoG like DNA-binding family	PF05224	Pfam	1	19	Ndt80/PhoG
Rap1, DNA-binding	PF09197	Pfam	1	20	Rap1
RFX DNA-binding domain	PF02257	Pfam	1	21	RFX
STE like transcription factor	PF02200	Pfam	1	24	STE
Transcription factor TFIID (or TATA-binding protein, TBP)	PF00352	Pfam	1	25	TBP
TEA/ATTS domain	PF01285	Pfam	1	26	TEA
Transcription factor Vhr1	PF04001	Pfam	1	28	VHR1
Fungal Zn(2)-Cys(6) binuclear cluster domain	PF00172	Pfam	1	29	Zinc cluster
ARID/BRIGHT DNA binding domain	PF01388	Pfam	1	30	ARID/BRIGHT
BED zinc finger	PF02892	Pfam	1	31	BED ZF
NF-X1 type zinc finger	PF01422	Pfam	1	32	NFX
